# Supplementary material for: Communication between distinct subunit interfaces of the cohesin complex promotes its topological entrapment of DNA
Source: eLife journal article supplement (doi:10.7554/elife.46347), 2019-06-04
Supplement: supp [file elife-46347-supp-v1.zip]

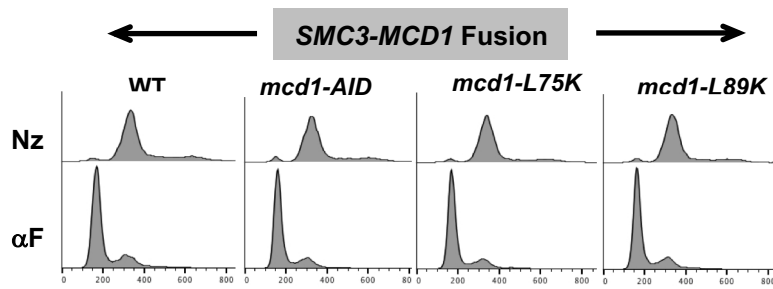

**Confirming cell cycle arrest of fusion cohesin bearing *mcd1* NHD interface mutants.** Strains with fusion cohesin alone or bearing *mcd1* interface mutants from Figure 7 were synchronously arrested in mid-M as described. FACS analysis was used to confirm arrest.
