# Supplementary material for: Communication between distinct subunit interfaces of the cohesin complex promotes its topological entrapment of DNA
Source: eLife journal article supplement (doi:10.7554/elife.46347), 2019-06-04
Supplement: supp [file elife-46347-supp-v1.zip]

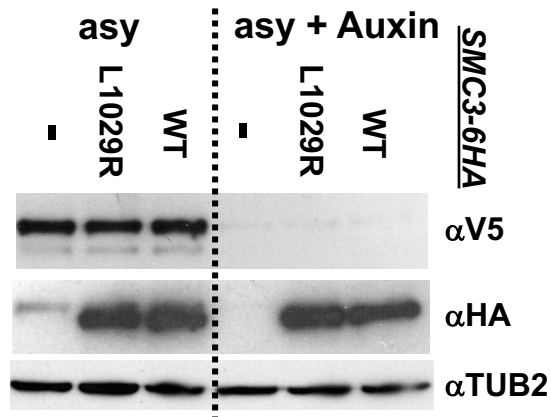

**Western blot to assess the effect of *smc3-L1029R* interface mutant on cohesin levels.** Haploid normal cohesin strains bearing Smc3p-3V5-AID alone (VG3651-3D) or containing either Smc3p-6HA (VG3943-1C) or Smc3p-6HA-L1029R (VG3944-3D) were grown asynchronously, auxin added and cells incubated 1h. Protein extracts were made before after auxin addition and analyzed by Western Blot. Smc3p-6HA tagged proteins were monitored using mouse anti-HA antibodies ( $\alpha$ HA), Smc3p-3V5-AID depletion was using mouse anti-V5 antibodies ( $\alpha$ V5) and rabbit anti-tubulin for a loading control ( $\alpha$ TUB2).
