# Supplementary material for: Communication between distinct subunit interfaces of the cohesin complex promotes its topological entrapment of DNA
Source: eLife journal article supplement (doi:10.7554/elife.46347), 2019-06-04
Supplement: supp [file elife-46347-supp-v1.zip]

**A**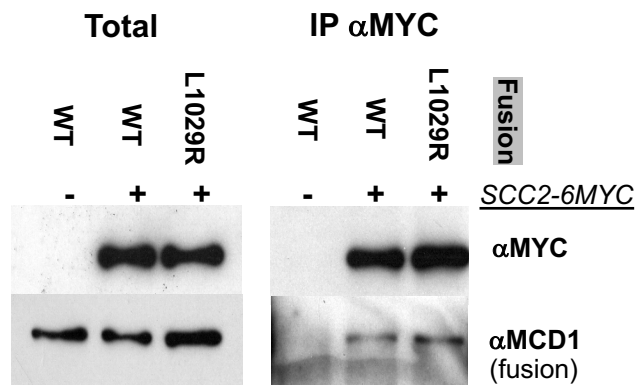**B**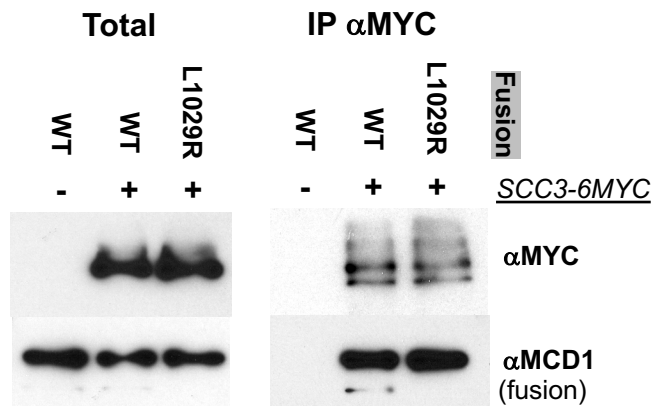**C**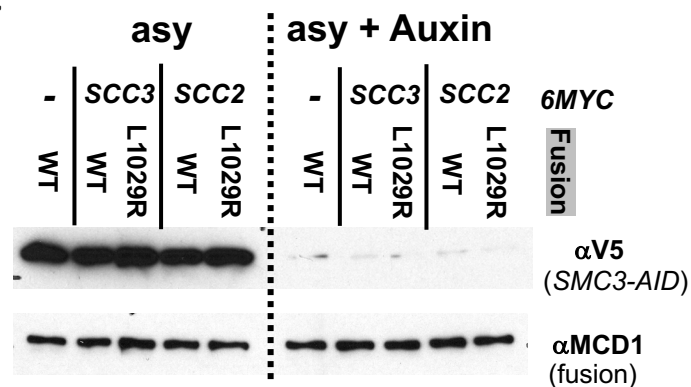

**Fusion wild-type and fusion L1029 mutant coimmunoprecipitate with Scc2p and Scc3p equally well.** (A) Fusion wild-type and L1029R mutant cohesin both co-IP with Scc2p. Haploid strain Scc2p-6MYC, Smc3p-3V5-AID bearing wild-type fusion cohesin (VG3952-14C) or fusion L1029R mutant (VG3953-17D) were grown asynchronously then auxin added and cells incubated 1h. An co-IP control without any MYC tagged proteins (VG3694-7C; wild-type fusion and Smc3p-3V5-AID) was also used. Protein extracts were made before after auxin addition. Mouse anti-MYC antibodies were used to immunoprecipitate MYC tagged proteins and analyzed by Western blot. Mouse anti-MYC antibodies detected MYC tagged Scc2p (αMYC), rabbit anti-Mcd1p antibodies detected fusion cohesin co-IP detected (αMCD1). (B) Fusion wild-type and L1029R mutant cohesin both co-IP with Scc3p. Haploid strain Scc3p-6MYC, Smc3p-3V5-AID bearing wild-type fusion cohesin (VG3949-5C) or fusion L1029R mutant (VG3950-8D) as well as control without any MYC tagged proteins (VG3694-7C; wild-type fusion and Smc3p-3V5-AID) were grown and treated as described in A. (C) Smc3p-3V5 depletion to confirm that fusion cohesin is sole cohesion in cells. Extracts from cells in A & B before and after auxin addition were analyzed by Western Blot. Smc3p-3V5-AID depletion was monitored using mouse anti-V5 antibodies (αV5) and fusion cohesin levels monitored using rabbit anti-Mcd1p antibodies (αMCD1).
