# Supplementary material for: Communication between distinct subunit interfaces of the cohesin complex promotes its topological entrapment of DNA
Source: eLife journal article supplement (doi:10.7554/elife.46347), 2019-06-04
Supplement: supp [file elife-46347-supp-v1.zip]

**A**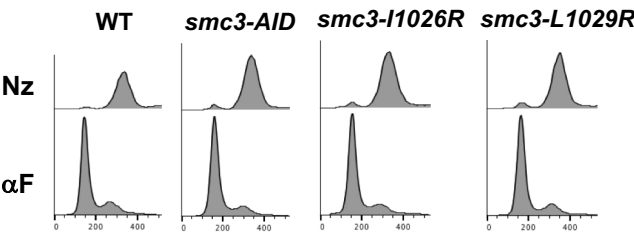**B**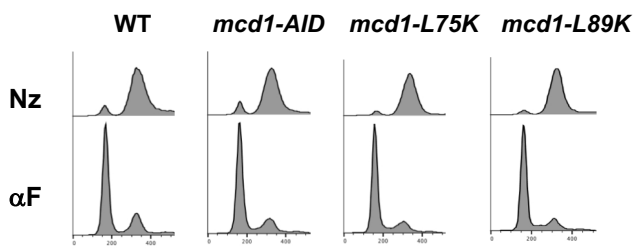

**FACS analysis showing cell cycle arrest of normal cohesin strains bearing interface mutations.** Strains with normal cohesin alone or bearing interface mutants were synchronously arrested in mid-M as described in Figure 3. (A) *smc3* interface mutants in normal cohesin strains from Figure 5. (B) *mcd1* interface mutants in normal cohesin strains from Figure 5.
